# Supplementary material for: Inclusion of 11-Oxygenated Androgens in a Clinical Routine LC-MS/MS Setup for Steroid Hormone Profiling
Source: MDPI journal article supplement (doi:10.3390/ijms24010539), 2022-12-29
Supplement: s1 [file s1]

## Supplement

**Table S1.** Result overview of interference experiments. Injection of 11-OHA4-d7 delivers a relevant signal (\*) with an intensity of 1.3% of its own intensity on the mass trace of 11-OHT. \*: Relevant signals with insufficient chromatographic separation.

|                                  |            | Injected analyte |            |        |          |         |            |        |           |       |       |       |
|----------------------------------|------------|------------------|------------|--------|----------|---------|------------|--------|-----------|-------|-------|-------|
|                                  |            | 11-KA4           | 11-KA4-d10 | 11-KT  | 11-KT-d3 | 11-OHA4 | 11-OHA4-d7 | 11-OHT | 11-OHT-d5 | F     | E     | DHEAS |
| Mass trace of interfered analyte | Analytes   | 100%             |            | 0.12%* |          | <0.1%*  | 0.2%*      | <0.1%* |           |       | 0.3%* |       |
|                                  | 11-KA4     | 100%             |            |        |          |         | 1.6        |        |           |       |       | 0.8%  |
|                                  | 11-KA4-d10 |                  | 100%       |        |          |         |            |        |           |       |       |       |
|                                  | 11-KT      | 2.0%             |            | 100%   |          | 3.4%    | 0.5%*      | <0.1%* |           |       |       |       |
|                                  | 11-KT-d3   |                  |            | 0.2%*  | 100%     |         | 0.2%*      | <0.1%* |           |       |       |       |
|                                  | 11-OHA4    | 1.3%             |            | 63%    |          | 100%    | 0.2%*      | <0.1%* |           | 0.3%* |       |       |
|                                  | 11-OHA4-d7 |                  | 0.3%       |        |          |         | 100%       |        | 93%       |       |       |       |
|                                  | 11-OHT     |                  |            | 0.5%   | 1.2%     | 2%      | 1.3%*      | 100%   |           |       |       |       |
|                                  | 11-OHT-d5  |                  | 3.9%       |        |          |         | 79%        |        | 100%      |       |       |       |
|                                  | F          |                  |            |        |          |         |            |        |           | 100%  |       |       |
|                                  | E          |                  |            |        |          |         |            |        |           |       | 100%  |       |
|                                  | DHEAS      |                  |            |        |          |         |            |        |           |       |       | 100%  |

11-KA4, 11-ketoandrostenedione; 11-KT, 11-ketotestosterone; 11-OHA4, 11 $\beta$ -hydroxyandrostenedione; 11-OHT, 11 $\beta$ -hydroxytestosterone; F, cortisol; E, cortisone; DHEAS, dehydroepiandrosterone sulfate.

**Table S2.** Experimental and calculated LLOQs as well as calculated LODs for 11-OAs.

| Analyte | LLOQ (exp., n=3) |        |     | LLOQ (calc., s/n = 10) | LOD (calc., s/n = 3) |
|---------|------------------|--------|-----|------------------------|----------------------|
|         | [pmol/l]         | CV [%] | s/n | [pmol/l]               | [pmol/l]             |
| 11-KA4  | 63               | 20     | 13  | 48                     | 15                   |
| 11-KT   | 100              | 9.1    | 17  | 59                     | 18                   |
| 11-OHA4 | 320              | 3.9    | 30  | 107                    | 32                   |
| 11-OHT  | 83               | 5.7    | 13  | 64                     | 19                   |

11-KA4, 11-ketoandrostenedione; 11-KT, 11-ketotestosterone; 11-OHA4, 11 $\beta$ -hydroxyandrostenedione; 11-OHT, 11 $\beta$ -hydroxytestosterone; CV, coefficient of variation; s/n, signal to noise.

**Table S3.** Means and standard derivation (SD) of determined concentrations of 11-OAs in 42 healthy individuals (19 males) between 2 and 79 years. <sup>a</sup>Mean of median concentrations of 83 females between 4 and 10 years. (Rege 2018, doi: 10.1210/jc.2018-00736) <sup>b</sup>Mean of mean concentrations of 141 healthy individuals (69 males) between 18 and 39 years. (Davio 2020, doi:10.1210/clinem/dgaa343)

|                   | 11-KA4<br>[nmol/l] | 11-KT<br>[nmol/l] | 11-OHA4<br>[nmol/l] | 11-OHT<br>[nmol/l] |
|-------------------|--------------------|-------------------|---------------------|--------------------|
| LLOQ              | 0.063              | 0.100             | 0.320               | 0.083              |
| Mean (SD)         | 0.41 (0.45)        | 0.78 (0.59)       | 2.10 (1.8)          | 0.25 (0.25)        |
| Mean <sup>a</sup> | 0.36               | 0.44              | 0.80                | 0.15               |
| Mean <sup>b</sup> | 0.53               | 0.84              | 3.98                | 0.39               |

**Table S4.** Concentrations of 17-OHP, A4, F, E, DHEAS, P and T in Chromsystems 6PLUS1 Multilevel serum calibrator level 1-5 and MassCheck® steroid serum control level 1-3 as well as spike concentration of 11-OAs in Chromsystems calibrators, Chromsystems controls and serum controls.

|         | <b>Chromsystems 6PLUS1 Multilevel serum calibrator</b> |                |               |               |                   |               |               | <b>Spike concentrations of 11-OAs in Chromsystems 6PLUS1 Multilevel serum calibrator</b> |                   |                     |                    |
|---------|--------------------------------------------------------|----------------|---------------|---------------|-------------------|---------------|---------------|------------------------------------------------------------------------------------------|-------------------|---------------------|--------------------|
|         | 17-OHP<br>[nmol/l]                                     | A4<br>[nmol/l] | F<br>[nmol/l] | E<br>[nmol/l] | DHEAS<br>[nmol/l] | P<br>[nmol/l] | T<br>[nmol/l] | 11-KA4<br>[nmol/l]                                                                       | 11-KT<br>[nmol/l] | 11-OHA4<br>[nmol/l] | 11-OHT<br>[nmol/l] |
| Level 1 | 0.284                                                  | 0.646          | 27.9          | 2.8           | 299               | 0.464         | 0.194         | 0.083                                                                                    | 0.083             | 0.83                | 0.082              |
| Level 2 | 1.45                                                   | 1.28           | 55.7          | 6.99          | 1427              | 2.44          | 0.884         | 0.33                                                                                     | 0.33              | 3.3                 | 0.33               |
| Level 3 | 2.84                                                   | 2.48           | 111           | 13.9          | 2811              | 6.39          | 3.45          | 0.83                                                                                     | 0.83              | 8.3                 | 0.82               |
| Level 4 | 5.78                                                   | 4.78           | 219           | 28.6          | 5547              | 15.9          | 10.3          | 3.3                                                                                      | 3.3               | 33.1                | 3.3                |
| Level 5 | 11.5                                                   | 15.9           | 403           | 56.9          | 10972             | 31.8          | 23            | 33.3                                                                                     | 33.1              | 331                 | 32.8               |
|         | <b>MassCheck® steroid serum control</b>                |                |               |               |                   |               |               | <b>Spike concentrations of 11-OAs in MassCheck® steroid serum control</b>                |                   |                     |                    |
| Level 1 | 0.923                                                  | 1.01           | 71.4          | 5.65          | 800               | 0.919         | 0.669         | 0.17                                                                                     | 0.17              | 1.7                 | 0.16               |
| Level 2 | 4.65                                                   | 4.14           | 175           | 34.2          | 4260              | 10.1          | 5.26          | 0.67                                                                                     | 0.66              | 6.6                 | 0.66               |
| Level 3 | 27.1                                                   | 33.5           | 496           | 81.5          | 13600             | 48.2          | 27.1          | 16.6                                                                                     | 16.5              | 165                 | 16.4               |
|         |                                                        |                |               |               |                   |               |               | <b>Spike concentrations of 11-OAs in serum control</b>                                   |                   |                     |                    |
| Level 1 |                                                        |                |               |               |                   |               |               | 0.17                                                                                     | 0.17              | 1.7                 | 0.16               |
| Level 2 |                                                        |                |               |               |                   |               |               | 0.67                                                                                     | 0.66              | 6.6                 | 0.66               |
| Level 3 |                                                        |                |               |               |                   |               |               | 16.6                                                                                     | 16.5              | 165                 | 16.4               |

17-OHP. 17 $\alpha$ -hydroxyprogesterone; A. aldosterone; A4. androstenedione; F. cortisol; E. cortisone; DHEAS. dehydroepiandrosterone sulfate; E2. estradiol; P. progesterone; T. testosterone; 11-KA4. 11-ketoandrostenedione; 11-KT. 11-ketotestosterone; 11-OHA4. 11 $\beta$ -hydroxyandrostenedione; 11-OHT. 11 $\beta$ -hydroxytestosterone;

**Table S5.** Quantifier and qualifier mass transitions for the 11-OAs including their IS.

| Analyte    | Precursor [M+H] <sup>+</sup> [u] | Quantifier [u] | Qualifier [u] |
|------------|----------------------------------|----------------|---------------|
| 11-KA4     | 301.2                            | 257.2          | 121.0         |
| 11-KA4-d10 | 311.2                            | 265.3          |               |
| 11-KT      | 303.2                            | 259.2          | 121.1         |
| 11-KT-d3   | 306.2                            | 262.2          |               |
| 11-OHA4    | 303.2                            | 267.2          | 145.2         |
| 11-OHA4-d7 | 310.2                            | 128.1          |               |
| 11-OHT     | 305.2                            | 269.2          | 121.0         |
| 11-OHT-d5  | 310.2                            | 125.1          |               |

**Table S6.** Mean levels and standard derivation of 11-OAs and 17-OHP. A4. E. DHEAS. P and T as well as significant ratios in 42 CAH patients and 42 healthy individuals matched for sex and age. \* $p < 0.01$ . \*\* $p < 0.05$ . \*\*\*  $p < 0.001$ .

| Analyte              | CAH (N=42) |      | Control (N=42) |       | CAH vs. Control |     |
|----------------------|------------|------|----------------|-------|-----------------|-----|
|                      | Mean       | SD   | Mean           | SD    | p-value         |     |
| 17-OHP [nmol/l]      | 142        | 203  | 1.3            | 1.1   | < 0.001         | *** |
| A4 [nmol/l]          | 14         | 29   | 1.6            | 1.5   | < 0.001         | **  |
| E [nmol/l]           | 42         | 25   | 62             | 21    | < 0.001         | *** |
| DHEAS [ $\mu$ mol/l] | 1208       | 1327 | 2286           | 2130  | 0.012           | *   |
| P [nmol/l]           | 6.3        | 7.5  | 2.2            | 6.1   | < 0.001         | *** |
| T [nmol/l]           | 4.4        | 6.5  | 3.8            | 7.3   | 0.015           | *   |
| 11-KA4 [nmol/l]      | 2.0        | 3.6  | 0.41           | 0.45  | 0.016           | *   |
| 11-KT [nmol/l]       | 4.3        | 6.6  | 0.78           | 0.59  | 0.001           | *   |
| 11-OHA4 [nmol/l]     | 15         | 27   | 2.1            | 1.8   | 0.006           | *   |
| 11-OHT [nmol/l]      | 1.4        | 2.9  | 0.25           | 0.25  | 0.080           |     |
| 17-OHP/11-KA4        | 118        | 118  | 4.9            | 4.6   | < 0.001         | *** |
| 17-OHP/11-KT         | 46         | 43   | 2.2            | 1.8   | < 0.001         | *** |
| 17-OHP/11-OHA4       | 21         | 22   | 0.89           | 0.70  | < 0.001         | *** |
| 17-OHP/11-OHT        | 346        | 619  | 8.3            | 8.2   | < 0.001         | *** |
| A4/11-OHT            | 18         | 19   | 7.9            | 7.0   | 0.004           | **  |
| DHEAS/KA             | 3444       | 5950 | 7154           | 7081  | < 0.001         | *** |
| DHEAS/KT             | 1236       | 2115 | 2969           | 2408  | < 0.001         | *** |
| DHEAS/OHA            | 470        | 730  | 1390           | 1533  | < 0.001         | *** |
| DHEAS/OHT            | 6221       | 8895 | 13524          | 14144 | < 0.001         | *** |
| T/11-OHT             | 8.3        | 12   | 24             | 50    | 0.042           | *   |
| 11-OHA4/11-OHT       | 15         | 13   | 10             | 5.7   | 0.013           | *   |

17-OHP. 17 $\alpha$ -hydroxyprogesterone; A4. androstenedione; E. cortisone; DHEAS. dehydroepiandrosterone sulfate; P. progesterone; T. testosterone; 11-KA4. 11-ketoandrostenedione; 11-KT. 11-ketotestosterone; 11-OHA4. 11 $\beta$ -hydroxyandrostenedione; 11-OHT. 11 $\beta$ -hydroxytestosterone; SD. standard derivation

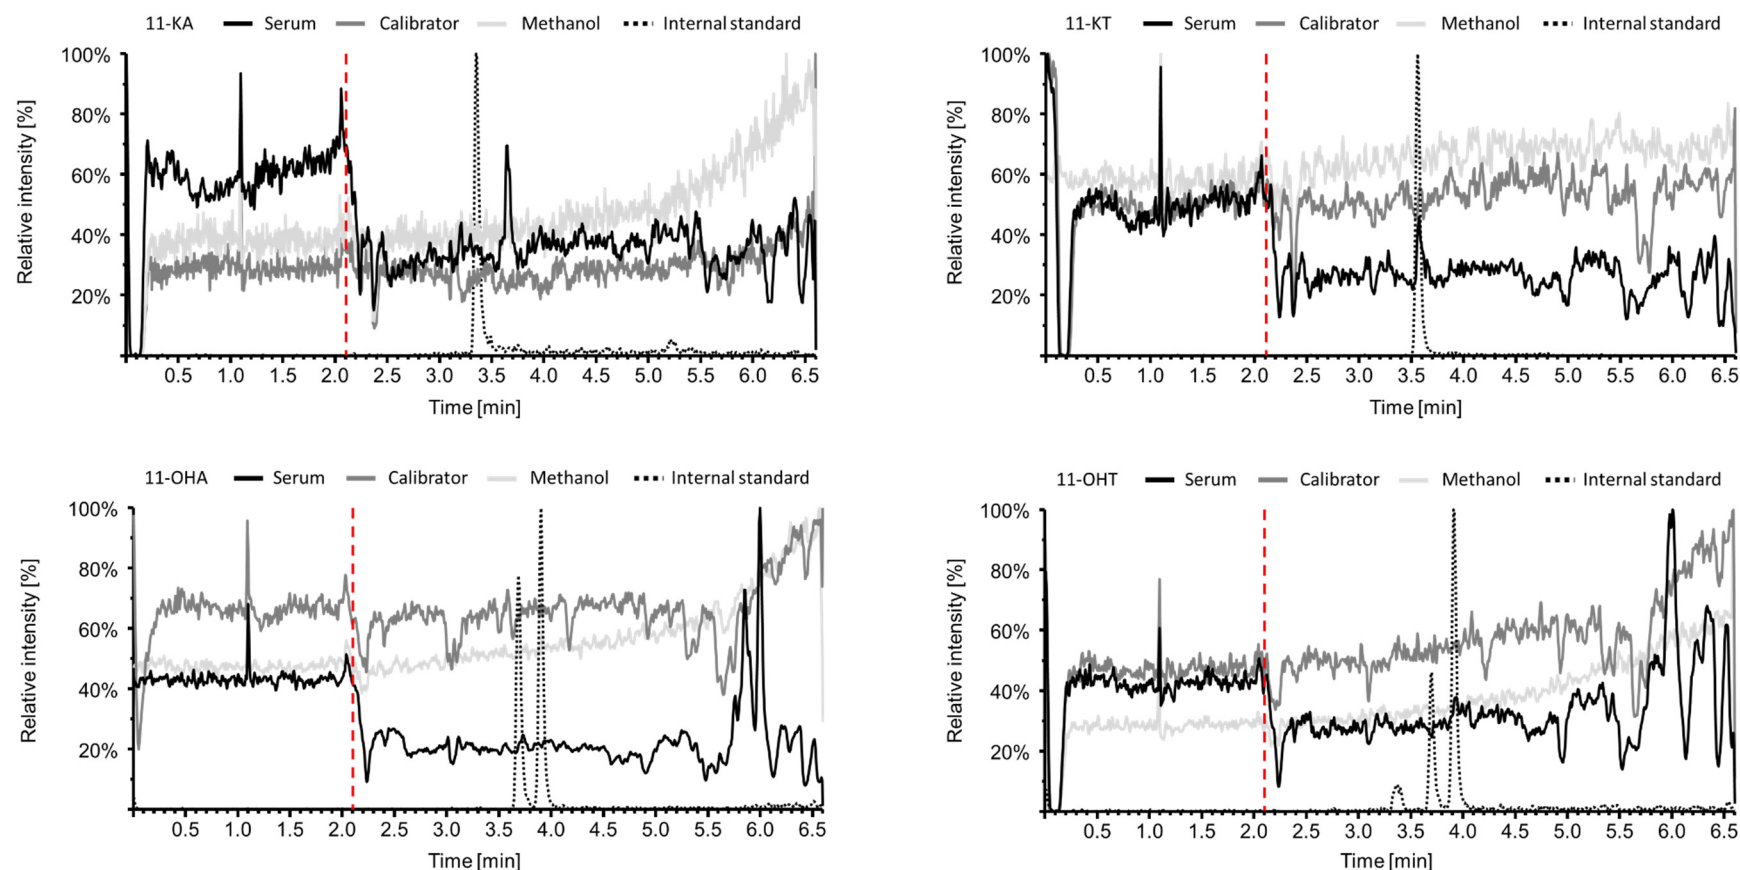

**Figure S1.** Exemplary chromatograms of post column infusion of four 11-OA including their corresponding internal standard (grey dashed line). In methanol (light grey) and calibrator (grey), negligible matrix effects were observed. In serum samples (black), an intensity loss by the first fraction of matrix constituents reaching the mass spectrometer was observed starting with the red dashed line in example chromatograms for 11-OAs. This ion suppression by the matrix of serum samples was observed across the detection window affecting all mass transitions of all analytes and internal standards. 11-KA4. 11-ketoandrostenedione; 11-KT. 11-ketotestosterone; 11-OHA4. 11 $\beta$ -hydroxyandrostenedione; 11-OHT. 11 $\beta$ -hydroxytestosterone.
